# Supplementary material for: ERCC1 19007 Polymorphism in Greek Patients with Advanced Urothelial Cancer Treated with Platinum-Based Chemotherapy: Effect of the Changing Treatment Paradigm: A Cohort Study by the Hellenic GU Cancer Group
Source: MDPI journal article supplement (doi:10.3390/curroncol28060380), 2021-11-05
Supplement: s1 [file s1]

Article

# ERCC1 19007 Polymorphism in Greek Patients with Advanced Urothelial Cancer Treated with Platinum-Based Chemotherapy: Effect of the Changing Treatment Paradigm. A Cohort Study by the Hellenic GU Cancer Group

Aristotelis Bamias <sup>1,2,\*</sup>, Konstantinos Koutsoukos <sup>2,3</sup>, Nikos Gavalas <sup>2,3</sup>, Roubini Zakopoulou <sup>1,2</sup>, Kimon Tzannis <sup>1,2</sup>, Nikos Dedes <sup>3</sup>, Anna Boulouta <sup>1</sup>, Charalampos Fragkoulis <sup>2,4</sup>, Eythymios Kostouros <sup>5</sup>, Athanasios Dellis <sup>6</sup>, Iraklis Mitsogiannis <sup>7</sup>, Ioannis Adamakis <sup>8</sup>, Ioannis Anastasiou <sup>8</sup>, Andreas Skolarikos <sup>7</sup>, Athanasios Papatsoris <sup>7</sup>, Konstantinos Stravodimos <sup>8</sup>, Nikolaos Ferrakis <sup>9</sup>, Stamatina Pagoni <sup>5</sup>, Konstantinos Ntoumas <sup>2,4</sup>, Dionysios Mitropoulos <sup>8</sup>, Charalambos Deliveliotis <sup>7</sup>, Constantinos A. Constantinides <sup>8</sup> and Meletios A. Dimopoulos <sup>2,3</sup>

## Supplementary Material

Figure S1. Patient disposition.

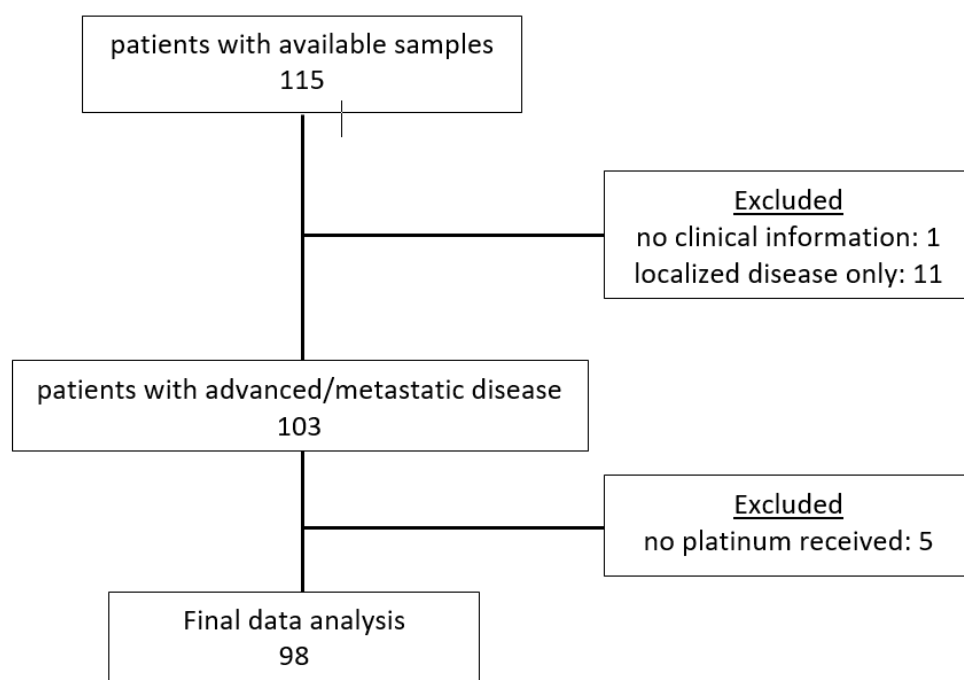

**Table S1.** Detailed description of chemotherapy received as 1<sup>st</sup>-line therapy.

| Group             | Regimen                                    | n  | % |
|-------------------|--------------------------------------------|----|---|
| Cisplatin-based   | DD GC <sup>1</sup>                         | 7  |   |
|                   | HD MVAC <sup>1</sup>                       | 1  |   |
|                   | MVAC <sup>2</sup>                          | 4  |   |
|                   | GC <sup>3</sup>                            | 34 |   |
|                   | GC-Atezolizumab <sup>3</sup>               | 2  |   |
| Carboplatin-based | MCAVi <sup>4</sup>                         | 4  |   |
|                   | GCa <sup>3</sup>                           | 34 |   |
|                   | GCa-Atezolizumab <sup>3</sup>              | 2  |   |
| Other             | Vinflunine <sup>5</sup>                    | 3  |   |
|                   | Docetaxel-Ramucirumab/Placebo <sup>6</sup> | 3  |   |
|                   | Durvalumab <sup>7</sup>                    | 2  |   |
|                   | Atezolizumab <sup>3</sup>                  | 2  |   |

DD: dose dense; GC: gemcitabine/cisplatin; MVAC: methotrexate, vinblastine, doxorubicin, cisplatin; MCAVi: methotrexate, carboplatin, vinblastine; GCa: gemcitabine/carboplatin.

**Table S2.** Progression free Survival for 98 patients included in the analysis.

| Total                  |                 |          | ERCC1 19007 genotypes |                 |                 |            |
|------------------------|-----------------|----------|-----------------------|-----------------|-----------------|------------|
|                        |                 | <i>p</i> | C/C                   | C/T             | T/T             | <i>p</i> * |
| Median PFS (95% CI)    |                 |          |                       |                 |                 |            |
| Total                  | 7.3 (6.2-10)    |          | 7.1 (3.6-33)          | 8 (6.2-15)      | 6.9 (4.6-12.2)  | .59        |
| Age at chemo start     |                 |          |                       |                 |                 |            |
| ≤68                    | 10 (7.1-19.8)   | .053     | 7.1 (3.6-NR)          | 16.5 (7.5-28.1) | 6.9 (2.9-31.5)  | .028       |
| >68                    | 6.3 (4.9-8.5)   |          | 5.7 (2.6-NR)          | 6.2 (4.6-10)    | 6.3 (2.7-13.8)  |            |
| BMI                    |                 |          |                       |                 |                 |            |
| ≤26                    | 6.1 (3.8-9.5)   | .056     | 9.5 (2.5-33)          | 6.2 (3.8-9.9)   | 5.6 (2.3-12.2)  | .065       |
| >26                    | 8.5 (7.1-18.7)  |          | 5.7 (2.6-NR)          | 14.2 (7.3-20.8) | 7.2 (5.6-26.7)  |            |
| BSA                    |                 |          |                       |                 |                 |            |
| ≤1.9                   | 6.3 (5.3-10)    | .41      | 5.3 (2.5-27.4)        | 7.5 (4.5-14.2)  | 6.3 (3.7-14.7)  | .52        |
| >1.9                   | 7.3 (6.8-16.8)  |          | 7.1 (3.6-NR)          | 10 (6.9-18.7)   | 7.1 (2.3-20.4)  |            |
| Gender                 |                 |          |                       |                 |                 |            |
| Female                 | 5.5 (2.6-52.9)  | .36      | 2.6 (2.6-NR)          | 5.5 (2.8-NR)    | 3.9 (0.5-NR)    | .23        |
| Male                   | 7.3 (6.3-12.2)  |          | 7.1 (3.6-27.4)        | 8 (6.8-15.1)    | 6.9 (5.6-12.2)  |            |
| Primary site           |                 |          |                       |                 |                 |            |
| Bladder                | 7.3 (6.2-13.8)  | .13      | 5.3 (3.2-NR)          | 8 (6.8-16.8)    | 6.9 (4.6-14.7)  | .15        |
| Pelvis                 | 8 (2.5-15.5)    |          | 15.5 (2.5-NR)         | 3.8 (2.8-NR)    | 12.2 (6.1-NR)   |            |
| Ureter                 | 2.3 (1.8-NR)    |          | -                     | NR              | 1.8 (1.8-NR)    |            |
| Urethra                | 7.1 (2.1-NR)    |          | 7.1 (7.1-NR)          | NR              | -               |            |
| ECOG PS                |                 |          |                       |                 |                 |            |
| 0                      | 8.5 (6.8-15.5)  | <.001    | 15.5 (2.5-34.5)       | 8.3 (5.8-20.8)  | 7.2 (5.6-13.8)  | .006       |
| 1                      | 7.1 (5.6-14.2)  |          | 4.9 (2.6-NR)          | 8 (5.5-16.8)    | 6.9 (1.2-NR)    |            |
| 2                      | 2.8 (0.5-NR)    |          | -                     | 2.8 (1.7-NR)    | 3.9 (0.5-NR)    |            |
| 3                      | 1.6 (1.6-NR)    |          | -                     | -               | 1.6 (1.6-NR)    |            |
| Disease status         |                 |          |                       |                 |                 |            |
| Distant                | 6.8 (4.8-8)     | .035     | 4.9 (2.6-9.5)         | 8 (6.8-18.7)    | 5.6 (2.7-7.1)   | .074       |
| Locally advanced/other | 14.2 (6.2-19.8) |          | 27.4 (2.5-NR)         | 7.3 (4.9-16.5)  | 20.4 (5.6-35.8) |            |
| MSKCC risk*            |                 |          |                       |                 |                 |            |
| Low                    | 14.7 (7.2-20.4) | <.001    | 27.4 (2.5-NR)         | 9.9 (5.5-16.5)  | 20.4 (5.6-35.8) | .002       |
| Intermediate           | 6.9 (5.6-8)     |          | 4.9 (2.6-9.5)         | 8 (4.8-18.7)    | 6.3 (2.7-10)    |            |
| High                   | 2.6 (1.6-NR)    |          | -                     | NR              | 2.6 (1.6-NR)    |            |
| Treatment              |                 |          |                       |                 |                 |            |
| Carbo based            | 6.1 (3.9-9.5)   | .071     | 4.9 (2.5-34.5)        | 4.8 (2.8-10)    | 8.5 (3.9-14.7)  | .044       |
| Cis based              | 8 (6.9-16.5)    |          | 15.5 (3.6-NR)         | 13.3 (7.3-19.8) | 5.6 (2.3-16.8)  |            |

|                                       |                 |     |                |                  |                |     |
|---------------------------------------|-----------------|-----|----------------|------------------|----------------|-----|
| Adjuvant                              | 24.4 (6.9-34.5) | .6  | 15.5 (4.9-NR)  | 24.4 (8-NR)      | 26.7 (5.6-NR)  | .64 |
| Neoadjuvant                           | 19.8 (13.3-33)  |     | NR             | 19.8 (13.3-28.7) | 13.8 (7.2-NR)  |     |
| Lines of therapy for advanced disease |                 | .32 |                |                  |                | .45 |
| 1                                     | 7 (5.3-14.7)    |     | 5.7 (4.9-NR)   | 7.3 (4.6-19.8)   | 5.6 (1.8-14.7) |     |
| ≥2                                    | 8 (6.3-13.8)    |     | 7.1 (2.6-27.4) | 8 (4.9-16.5)     | 7.2 (4.6-16.8) |     |
| Immunotherapy                         |                 | .43 |                |                  |                | .3  |
| Yes                                   | 8.3 (5.3-15.5)  |     | 5.3 (2.5-15.5) | 13.3 (3.8-23.3)  | 6.3 (3.9-35.8) |     |
| No                                    | 7.2 (5.7-15.5)  |     | 7.1 (3.2-NR)   | 7.5 (5.5-14.2)   | 6.9 (2.6-13.8) |     |
| Vinflunine                            |                 | .91 |                |                  |                | .98 |
| Yes                                   | 10 (6.1-20.4)   |     | 3.6 (2.6-NR)   | 16.5 (2.1-28.7)  | 10 (6.1-NR)    |     |
| No                                    | 7 (5.6-9.5)     |     | 9.5 (3.2-NR)   | 7.3 (5.5-14.2)   | 6.3 (2.9-12.2) |     |

\*Stratified for genotypes; BMI: Body mass index; BSA: body surface area; ECOG: Eastern Co-operative Oncology Group; MSKCC: Memorial Sloan Kettering Cancer Center; \*: according to ref 7; NR: not reached.

**Table S3.** Overall Survival for 98 patients included in the analysis.

|                        | Total            |          | ERCC1 19007 genotypes |                  |                 |            |
|------------------------|------------------|----------|-----------------------|------------------|-----------------|------------|
|                        |                  | <i>p</i> | C/C                   | C/T              | T/T             | <i>p</i> * |
| Median OS (95% CI)     |                  |          |                       |                  |                 |            |
| Total                  | 19.8 (12.6-26.3) |          | 30.7 (11.8-NR)        | 18.6 (9.1-28.7)  | 19.8 (8.3-25.9) | .31        |
| Age at chemo start     |                  |          |                       |                  |                 |            |
| ≤68                    | 25.9 (11.7-32.7) | .3       | 30.7 (6.4-NR)         | 28.1 (9.9-41.1)  | 19.8 (6.5-32.7) | .23        |
| >68                    | 16.7 (9.1-23.7)  |          | 18.8 (7.1-NR)         | 13.1 (7.2-24.2)  | 15.8 (5.7-30)   |            |
| Bmi                    |                  |          |                       |                  |                 |            |
| ≤26                    | 16.7 (8.8-21)    | .21      | 30.7 (13.7-NR)        | 10.7 (7.2-24.2)  | 8.3 (5.6-21.4)  | .108       |
| >26                    | 27.2 (12.6-32.7) |          | 11.8 (6.4-NR)         | 27.2 (9.4-38.2)  | 26.3 (9.5-35.6) |            |
| BSA                    |                  |          |                       |                  |                 |            |
| ≤1.9                   | 17.5 (9.1-24.2)  | .36      | 18.8 (6.4-48.4)       | 9.9 (6.7-24.2)   | 21 (6.5-30)     | .39        |
| >1.9                   | 23.2 (12.6-32.4) |          | 48.9 (7.1-NR)         | 28.1 (11.7-36.9) | 12.6 (5.8-32.4) |            |
| Gender                 |                  |          |                       |                  |                 |            |
| Female                 | 30 (6.5-NR)      | .21      | 11.8 (11.8-NR)        | 6.7 (5.5-NR)     | 30 (4.9-NR)     | .15        |
| Male                   | 18.8 (11.7-24.2) |          | 30.7 (7.1-48.9)       | 18.6 (9.4-28.1)  | 14.7 (7.7-22.7) |            |
| Primary site           |                  |          |                       |                  |                 |            |
| Bladder                | 17.5 (10.7-24.2) |          | 17.5 (6.8-NR)         | 18.6 (9.4-28.7)  | 14.7 (7.7-30)   |            |
| Pelvis                 | 21.4 (6.7-32.4)  | .79      | 41.9 (30.7-NR)        | 7.2 (6.7-NR)     | 21.4 (19.8-NR)  | .77        |
| Ureter                 | 25.9 (5.8-NR)    |          | -                     | NR               | 5.8 (5.8-NR)    |            |
| Urethra                | 48.9 (18.6-NR)   |          | 48.9 (NR)             | NR               | -               |            |
| ECOG PS                |                  |          |                       |                  |                 |            |
| 0                      | 25.9 (17.5-32.4) |          | 41.9 (6.4-NR)         | 28.1 (11.7-46.5) | 21.4 (8.8-26.3) |            |
| 1                      | 14.7 (8.3-22.8)  | <.001    | 18.8 (3.7-NR)         | 10.7 (7-24.2)    | 9.5 (1.2-NR)    | .002       |
| 2                      | 5.6 (4.2-NR)     |          | -                     | 5.6 (4.2-NR)     | 30 (4.9-NR)     |            |
| 3                      | 1.6 (1.6-NR)     |          | -                     | -                | 1.6 (1.6-NR)    |            |
| Disease status         |                  |          |                       |                  |                 |            |
| Distant                | 17.5 (8.3-23.7)  | .17      | 17.5 (6.8-NR)         | 23.2 (7-59)      | 8.8 (5.9-23.7)  | .3         |
| Locally advanced/other | 22.8 (13.1-31.8) |          | 48.4 (6.4-NR)         | 16.7 (8.8-28.7)  | 32.4 (9.5-59)   |            |
| MSKCC risk*            |                  |          |                       |                  |                 |            |
| Low                    | 27.2 (13.7-32.4) |          | 48.4 (6.4-NR)         | 18.6 (9.1-28.6)  | 32.4 (9.5-NR)   |            |
| Intermediate           | 18.6 (8.8-23.7)  | .028     | 17.5 (6.8-NR)         | 23.2 (7-41.1)    | 15.8 (5.9-25.9) | .092       |
| High                   | 5.6 (1.6-NR)     |          | -                     | NR               | 5.7 (1.6-NR)    |            |
| Treatment              |                  |          |                       |                  |                 |            |

|                                       |                  |      |                  |                  |                 |      |
|---------------------------------------|------------------|------|------------------|------------------|-----------------|------|
| Carbo based                           | 18.8 (8.8-26.3)  | .28  | 17.5 (6.8-NR)    | 8.8 (5.6-36.9)   | 21.4 (8.8-30)   | .29  |
| Cis based                             | 22.7 (10.7-29.6) |      | 48.4 (6.4-NR)    | 22.8 (9.9-29.6)  | 8.3 (5.6-35.6)  |      |
| Adjuvant                              | 30.7 (8.3-NR)    | .77  | 30.7 (6.8-NR)    | 27.2 (8.3-NR)    | 32.7 (5.6-NR)   | .94  |
| Neoadjuvant                           | 35.6 (18.6-59)   |      | NR               | 31 (18.6-38.2)   | 35.6 (12.6-NR)  |      |
| Lines of therapy for advanced disease |                  | .12  |                  |                  |                 | .102 |
| 1                                     | 8.3 (6.4-23.2)   |      | 7.1 (6.4-NR)     | 8.3 (5.5-28.1)   | 8.3 (2.3-25.9)  |      |
| ≥2                                    | 23.7 (18.6-31.8) |      | 30.7 (13.7-48.9) | 24.2 (10.7-38.2) | 21 (8.8-32.4)   |      |
| Immunotherapy                         |                  | .073 |                  |                  |                 | .058 |
| Yes                                   | 24.2 (15.8-41.9) |      | 17.5 (6.4-41.9)  | 38.2 (8.8-NR)    | 23.7 (6.5-58.9) |      |
| No                                    | 14.7 (9.4-23.2)  |      | 48.4 (7.1-NR)    | 11.7 (7.3-27.2)  | 12.6 (5.9-22.7) |      |
| Vinflunine                            |                  | .43  |                  |                  |                 | .5   |
| Yes                                   | 29.6 (19.8-35.6) |      | 21 (11.8-NR)     | 29.6 (18.6-41.1) | 21 (12.6-NR)    |      |
| No                                    | 15.8 (8.8-23.2)  |      | 41.9 (6.8-NR)    | 11.7 (7.3-24.2)  | 14.7 (6.3-25.9) |      |

\*Stratified for genotypes; BMI: Body mass index; BSA: body surface area; ECOG: Eastern Co-operative Oncology Group; MSKCC: Memorial Sloan Kettering Cancer Center; \*: according to ref 7; NR: not reached.

## References

1. Bamias, A.; Dafni, U.; Karadimou, A.; Timotheadou, E.; Aravantinos, G.; Psyrri, A.; Xanthakis, I.; Tsiatas, M.; Koutoulidis, V.; Constantinidis, C.; et al. Prospective, open-label, randomized, phase III study of two dose-dense regimens MVAC versus gemcitabine/cisplatin in patients with inoperable, metastatic or relapsed urothelial cancer: a Hellenic Cooperative Oncology Group study (HE 16/03). *Ann. Oncol.* **2013**, *24*, 1011–1017.
2. Bamias, A.; Aravantinos, G.; Deliveliotis, C.; Bafaloukos, D.; Kalofonos, C.; Xiros, N.; Zervas, A.; Mitropoulos, D.; Samantas, E.; Pectasides, D.; et al. Hellenic Cooperative Oncology Group. Docetaxel and cisplatin with granulocyte colony-stimulating factor (G-CSF) versus MVAC with G-CSF in advanced urothelial carcinoma: a multicenter, randomized, phase III study from the Hellenic Cooperative Oncology Group. *J. Clin. Oncol.* **2004**, *22*, 220–228.
3. Galsky, M.D.; Ariba, J.A.A.; Bamias, A.; Davis, I.D.; De Santis, M.; Kikuchi, E.; Garcia-Del-Muro, X.; De Giorgi, U.; Mencinger, M.; Izumi, K.; et al. Atezolizumab with or without chemotherapy in metastatic urothelial cancer (IMvigor130): a multicentre, randomised, placebo-controlled phase 3 trial. *Lancet* **2020**, *395*, 1547–1557.
4. De Santis, M.; Bellmunt, J.; Mead, G.; Kerst, J.M.; Leahy, M.; Maroto, P.; Gil, T.; Marreud, S.; Daugaard, G.; Skoneczna, I.; et al. Randomized phase II/III trial assessing gemcitabine/carboplatin and methotrexate/carboplatin/vinblastine in patients with advanced urothelial cancer who are unfit for cisplatin-based chemotherapy: EORTC study 30986. *J. Clin. Oncol.* **2012**, *30*, 191–199.
5. Petrylak, D.P.; de Wit, R.; Chi, K.N.; Drakaki, A.; Sternberg, C.N.; Nishiyama, H.; Castellano, D.; Hussain, S.; Fléchon, A.; Bamias, A.; et al. Ramucirumab plus docetaxel versus placebo plus docetaxel in patients with locally advanced or metastatic urothelial carcinoma after platinum-based therapy (RANGE): a randomised, double-blind, phase 3 trial. *Lancet* **2017**, *390*, 2266–2277.
6. Pistamaltzian, N.; Tzannis, K.; Pissaniidou, V.; Peroukidis, S.; Milaki, G.; Karavasilis, V.; Mitsogiannis, I.; Varkarakis, I.; Papatsoris, A.; Dellis, A.; et al. Treatment of relapsed urothelial bladder cancer with vinflunine: real-world evidence by the Hellenic Genitourinary Cancer Group. *Anticancer Drugs* **2016**, *27*, 48–53.
7. Powles, T.; van der Heijden, M.S.; Castellano, D.; Galsky, M.D.; Loriot, Y.; Petrylak, D.P.; Ogawa, O.; Park, S.H.; Lee, J.L.; De Giorgi, U.; et al. Durvalumab alone and durvalumab plus tremelimumab versus chemotherapy in previously untreated patients with unresectable, locally advanced or metastatic urothelial carcinoma (DANUBE): a randomised, open-label, multicentre, phase 3 trial. *Lancet Oncol.* **2020**, *21*, 1574–1588.
